# Supplementary material for: Kv1.1 contributes to a rapid homeostatic plasticity of intrinsic excitability in CA1 pyramidal neurons in vivo
Source: eLife. 2019 Nov 27;8:e49915. doi: 10.7554/eLife.49915 (PMC6881145; doi:10.7554/eLife.49915)
Supplement: Figure 1—source data 1. [file elife-49915-fig1-data1.xlsx]

## Sheet: Feuil1
	Imax Mean Spike Count
	TBS					Control
TBS Spikes	Pre	10min	20min	30min		Pre	10min	20min	30min
154	4.7	5.4	5.4	5.8		10.4	7.3	7.6
236	11.8	11	12	10.9		8.6	8.3	11.1	9.4
207	7.8	8.9	8.1	8.9		10.9	11.3	10.8	10.7
240	9.2	7.4	9.2	12.1		11.9	11.5	10.8
225	9.1	6.1	5.7	8.9		10.8	11.3	9.8
244	8.4	6.8	4.1	2.9		5.4	4.4	4.1
270	10.1	7.5	4.1			10.6	8.4	9.4	9.2
261	8.6	4.8	3	4.2		6.3	7.1	5.4
236	8.3	4.4	5.1	5.4		10.3	10.3	10.2	10.4
187	4.9	3.9	4.3	5.4		13.7	12.6	13.1	11.9
212	5.9	5.2	5.7	6.5		13	13.3	14.8	13
288	10.8	8.9	9.4	10.7
289	14.5	11.5	9.3	9.4
270	8	6.3	2.9	1.3
231	8.9	6.3	5.9
265	9.1	5.6	2.4	1.2
