# Supplementary material for: Kv1.1 contributes to a rapid homeostatic plasticity of intrinsic excitability in CA1 pyramidal neurons in vivo
Source: eLife. 2019 Nov 27;8:e49915. doi: 10.7554/eLife.49915 (PMC6881145; doi:10.7554/eLife.49915)
Supplement: Figure 2—source data 1. [file elife-49915-fig2-data1.xlsx]

## Sheet: Feuil1
Input Resistance (MOhms)					Latency (ms)
TBS		Control			TBS		Control
Pre	20min	Pre	20min		Pre	20min	Pre	20min
29.0756	27.9784	66.7675	69.3877		10.45	10.975	31.225	44.925
55.7406	50.7698	56.5724	49.741		22.875	24.65	23.975	21.75
41.3	45.1	50.5827	50.2576		24.675	32.7	23.325	27.3
38.598	38.3016	49.9841	50.7034		33.875	33.7	31.025	30.775
57.3446	42.3255	58.18	54.4183		26.925	24.775	36.175	27.525
44.8063	39.7832	55.8951	49.5056		35.725	81.525	25.675	33
48.8658	42.2209	63.3378	69.824		25.85	105.5	5.45	12.575
44.8076	35.737	57.0474	61.1418		32.8	92.575	13.575	13.425
50.3161	50.308	51.303	50.1537		45.05	87.075	32.775	30.925
54.5285	53.888	58.9111	61.2726		85	213.275	50	48.575
48.0935	50.6197	54.8582	47.4124		49.4	54.325	24.975	34.8
61.8396	49.4969				32.625	33.325
58.886	47.4063				18.3	25.6
55.8374	50.1236				51.9	194.875
33.1868	28.5737				28.8	53.075
56.0945	44.4212				34.4	152.65
