# Supplementary material for: Kv1.1 contributes to a rapid homeostatic plasticity of intrinsic excitability in CA1 pyramidal neurons in vivo
Source: eLife. 2019 Nov 27;8:e49915. doi: 10.7554/eLife.49915 (PMC6881145; doi:10.7554/eLife.49915)
Supplement: Figure 3—source data 1. [file elife-49915-fig3-data1.xlsx]

## Sheet: Feuil1
Spike Count			Input Resistance (MOhms)			Latency (ms)
Pre	20min		Pre	20min		Pre	20min
7.5	12.4		44.5327	48.9634		29.825	29.225
6.2	7.5		37.1657	34.3448		30.275	29.05
8.7	11.2		36.4942	38.2414		47.075	43.8
10.7	8.2		45.3462	38.8138		26.15	38.65
7.7	13.2		34.0035	43.1238		18.425	18.075
10.1	8.6		45.286	42.4354		44.3	52.775
10.3	11.5857		44.1894	45.7158		21.25	23.125
