# Supplementary material for: Kv1.1 contributes to a rapid homeostatic plasticity of intrinsic excitability in CA1 pyramidal neurons in vivo
Source: eLife. 2019 Nov 27;8:e49915. doi: 10.7554/eLife.49915 (PMC6881145; doi:10.7554/eLife.49915)
Supplement: Figure 4—source data 1. [file elife-49915-fig4-data1.xlsx]

## Sheet: Feuil1
Spike Count			Input Resistance (MOhms)			Latency (ms)
Pre	20min		Pre	20min		Pre	20min
7.6	3.1		44.47	35.8942		37.85	187.475
6	1		38.7495	36.3344		51.025	104.9
11	7.7		65.7513	54.3983		25.375	42.25
8.2	5.9		51.6994	42.5899		36.35	44.425
10.3	8.5		49.8786	48.1383		31.1	45.05
8.7	8.9		54.308	49.0713		41.25	44.725
10.1	2.1		53.2426	43.2471		41.525	229.225
