# Supplementary material for: Kv1.1 contributes to a rapid homeostatic plasticity of intrinsic excitability in CA1 pyramidal neurons in vivo
Source: eLife. 2019 Nov 27;8:e49915. doi: 10.7554/eLife.49915 (PMC6881145; doi:10.7554/eLife.49915)
Supplement: Figure 5—source data 1. [file elife-49915-fig5-data1.xlsx]

## Sheet: Feuil1
Sag Ratio
TBS		BAPTA		MK801
Pre	20min	Pre	20min	Pre	20min
0.927639	0.969724	0.944929	0.889916	0.891784	0.886892
0.869399	0.877472	0.917739	0.94193	0.797418	0.828638
0.874194	0.917599	0.841955	0.845335	0.872486	0.885417
0.797261	0.812593	0.881664	0.893196	0.896172	0.900196
0.812137	0.887522	0.869308	0.882107	0.873123	0.881351
0.858954	0.861801	0.868718	0.799755	0.824556	0.826812
0.829227	0.829114	0.827334	0.80995	0.87154	0.815336
0.845329	0.839354
0.830358	0.849805
0.841195	0.886869
0.756863	0.783816
0.848536	0.823629
0.872238	0.882614
0.813356	0.841853
0.881719	0.880708
0.80163	0.810261
