# Supplementary material for: Kv1.1 contributes to a rapid homeostatic plasticity of intrinsic excitability in CA1 pyramidal neurons in vivo
Source: eLife. 2019 Nov 27;8:e49915. doi: 10.7554/eLife.49915 (PMC6881145; doi:10.7554/eLife.49915)
Supplement: Figure 6—source data 1. [file elife-49915-fig6-data1.xlsx]

## Sheet: Feuil1
Spike Count			Input Resistance (MOhms)			Latency (ms)
Pre	20min		Pre	20min		Pre	20min
8.5	5.5		68.1278	58.4494		47.625	114.175
7.4	7.9		58.9179	59.9342		40.625	69.125
7.3	3.2		59.5258	48.8896		64.95	120.95
11.3	9.5		67.2613	60.6552		50.15	83
7.9	6.4		94.7991	72.4898		36.95	58.775
9.1	7.5		85.1081	66.5831		31.9	48.4
