# Supplementary material for: Kv1.1 contributes to a rapid homeostatic plasticity of intrinsic excitability in CA1 pyramidal neurons in vivo
Source: eLife. 2019 Nov 27;8:e49915. doi: 10.7554/eLife.49915 (PMC6881145; doi:10.7554/eLife.49915)
Supplement: Figure 7—source data 1. [file elife-49915-fig7-data1.xlsx]

## Sheet: Feuil1
Spike Count			Input Resistance (MOhms)			Latency (ms)
Pre	20min		Pre	20min		Pre	20min
9.2	5.8		45.8348	43.0605		34.05	67.05
9.5	5.7		51.7574	50.3859		36.575	63.475
10.8	7.9		49.3185	47.6649		26.15	38.05
8.6	8.3		51.5008	44.0574		32.3	39.4
9.4	6.5		49.9503	48.444		31.725	43.55
10.7	9.1		63.6067	61.4023		29.2	38.25
