# Supplementary material for: Kv1.1 contributes to a rapid homeostatic plasticity of intrinsic excitability in CA1 pyramidal neurons in vivo
Source: eLife. 2019 Nov 27;8:e49915. doi: 10.7554/eLife.49915 (PMC6881145; doi:10.7554/eLife.49915)
Supplement: Figure 8—figure supplement 1—source data 1. [file elife-49915-fig8-figsupp1-data1.xlsx]

## Sheet: Familiar
	In-field firing rate (Hz)				Out-of-field firing rate (Hz)				Lap-by-lap Correlation
	Start	Middle	End		Start	Middle	End		In-field	Out-of-field
	1.31224	1.41512	1.60512		0.000957761	0.856138	0.838025		0.562411	0.306227
	1.72987	14.8088	3.71002		0	3.25016	0.6691		-0.248984	-0.257226
	24.965	10.6319	3.52983		3.81683	0.912653	0.710594		-0.903686	-0.758719
	10.0039	7.84299	12.2416		3.0616	6.62922	3.07175		0.545608	-0.337895
	11.2424	12.0535	7.72005		7.32779	6.03134	2.04107		-0.433175	-0.720676
	0	1.1318	3.26743		0	0.0721105	0.187383		0.960753	0.386487
	2.40422	0.378472	1.38471		0.0599081	0.141776	0.0497415		-0.200288	0.042829
	2.2716	3.0931	6.56581		0.0375276	0.516912	0.167939		0.672174	-0.251743
	2.29873	1.47549	1.86713		0.281889	0.203233	0.20313		0.0929433	-0.121843
	2.19694	0.763099	1.31863		0.363591	0.5146	0.354616		-0.300449	-0.365312
	2.68377	1.25785	1.48211		0.696044	0.104263	0.0663652		-0.171781	-0.698734
	1.8276	1.48527	2.47804		0.129382	0.414334	0.1707		0.547025	-0.33557
	6.52539	3.0827	5.12703		4.31665	1.15656	2.6917		-0.0272554	-0.232929
	3.65204	5.64616	4.43018		0.112746	0.994152	0.969006		-0.108696	0.434933
	10.3188	5.88499	2.96279		2.08033	1.67248	0.751908		-0.779404	-0.758126
	3.41524	3.55681	5.13409		2.23931	0.602131	0.74244		0.561647	-0.490724
	2.44606	2.33639	2.57311		0.178124	0.833152	1.26925		0.364824	0.796407
	5.04113	4.79714	3.42751		0.369161	1.30148	0.753261		-0.587222	-0.0604638
	3.58337	2.66271	2.53341		2.64056	1.25992	0.799957		-0.82658	-0.89659
	1.52824	2.18209	2.05097		0.791379	1.43184	1.24652		0.336309	0.280337
	2.42768	2.09394	2.46893		1.26376	1.78051	0.782529		0.221611	-0.638315
	8.68315	5.05177	6.42954		0.852825	1.49545	0.577418		-0.223232	-0.215914
	8.59955	11.2681	8.83374		0.999298	7.3027	2.67732		-0.0613747	-0.168072
	4.02093	2.55284	0.60211		0.103362	0.0770651	0.00194891		-0.825849	-0.367211
	5.17737	2.53978	3.56052		1.43794	0.645703	1.34778		-0.215155	-0.062943
	6.35455	5.01186	3.476		1.24841	0.593088	0.993359		-0.75395	-0.132378
	18.3532	17.3016	22.031		9.79938	10.1656	14.2737		0.599767	0.704267
	17.899	18.3241	19.017		14.9525	12.5606	13.2892		0.312855	-0.318328
	9.73313	5.62505	6.56389		2.73138	1.35733	2.62605		-0.502188	0.21718
	9.84062	7.64527	5.45477		4.39449	1.96051	2.31365		-0.740606	-0.55802
	15.0819	14.4862	10.8518		0.271717	5.85414	1.45041		-0.168579	-0.0223846
	4.06655	10.9067	5.6626		0.0821344	1.18585	1.11729		0.00220057	0.369574
	1.1388	1.60337	2.11987		0.794987	0.772657	0.844083		0.681379	0.00249019
	7.45396	3.61709	3.5637		0.115841	0.135044	0.128536		-0.535084	0.292345
	3.05257	1.49885	1.09249		0.63653	0.247494	0.45886		-0.724868	-0.323219
	7.50784	7.63207	4.9608		1.16731	1.13532	0.529445		-0.649571	-0.492729
	5.42463	2.39364	0.0862797		1.47495	0.292072	0.00020128		-0.87133	-0.578588
	2.70503	1.58827	0.241152		0.674833	0.299944	0.038876		-0.752906	-0.888214
	0.293024	1.57989	3.88031		0.33865	0.61851	0.866302		0.898924	0.469073
	9.89222	5.51986	3.95001		2.60038	2.21908	2.45598		-0.829995	-0.0704542
	1.84699	6.911	5.31003		0.467652	2.18943	3.93903		0.580956	0.931757
	1.77528	1.7471	0.976822		0.710114	0.285214	0.656413		-0.418066	0.219415
	9.41876	2.19664	3.34703		0.652121	0.558975	1.40262		-0.740219	0.473511
	2.36973	1.75661	1.3748		0.379842	0.649515	0.617026		-0.402123	0.377736
	1.51222	2.94961	2.92463		1.04632	0.974002	0.792998		0.678796	-0.231759
	0.168259	0.895873	0		0.176343	0.0696108	0		-0.284717	-0.872854
	4.92784	2.13805	0.164169		0.309887	0.0160058	0.000284727		-0.949082	-0.803299
	1.7246	0.36606	0		0.14929	0.0852674	0		-0.739486	-0.575559
	2.73793	3.31502	4.40667		0.776261	0.628706	0.772502		0.49354	-0.0410657
	4.15977	6.69022	3.57122		0.967288	1.65288	1.23303		-0.229934	-0.0295598
	0.00151885	0	0.0998339		0.0558399	0	0.0377113		0.614171	-0.151954
	0.752663	1.8509	1.37985		0.191161	0.291815	0.381595		0.240711	0.535639
	4.44561	5.33166	4.50687		1.2105	0.807208	1.37858		0.0128739	0.072181
	7.39828	5.74112	8.32344		2.75114	2.75865	2.04005		0.080019	-0.377495
	12.26	12.1163	11.6257		3.60624	2.55375	3.80171		-0.214689	-0.0747812
	13.6128	11.76	9.24477		1.00597	0.677829	0.136754		-0.822231	-0.711099
	5.30888	2.98643	2.37992		0.524813	0.811355	0.461547		-0.849788	-0.0726326
	3.64784	3.17624	3.57942		2.00789	2.33629	1.32409		-0.0851898	-0.275923
	3.51676	3.46435	3.53094		1.32641	1.39356	1.36054		-0.177231	0.0341708
	4.28845	4.36877	6.24892		1.90929	2.02806	2.09577		0.684211	0.196821
	4.13151	3.26386	6.20659		2.0067	1.37998	2.33241		0.373334	0.0518929
	2.10596	1.87809	1.84639		0.0569641	0.13213	0.285151		0.0905943	0.377348
	3.02807	2.81107	3.30933		0.552385	0.7898	1.17658		0.1481	0.486238
	3.20728	1.92664	2.27955		0.553336	0.878706	0.733635		-0.358755	0.469143
	4.59089	3.03348	2.27116		0.963003	0.735602	0.659385		-0.724591	-0.540441
	4.89743	3.57534	2.11938		1.04817	0.815073	0.698092		-0.747476	-0.672941
	5.21445	5.14595	5.01171		3.38029	2.45146	2.32645		-0.142335	-0.875147
	12.0962	10.7892	10.6246		4.76482	4.21488	3.07661		-0.345926	-0.547791
	5.68349	5.14927	3.66771		3.01957	2.69905	1.70593		-0.578167	-0.686064
	1.23852	0.957727	1.25533		0.584041	0.51864	0.449215		0.0785723	-0.352621
	4.13879	2.65701	3.07809		1.284	0.932401	0.815788		-0.550936	-0.373451
	4.40405	3.17013	3.52799		2.9898	1.79787	1.95629		-0.522595	-0.323406
	12.6929	11.2863	10.9741		2.99959	3.39189	4.16805		-0.302411	0.652402
	12.4146	8.69435	10.979		3.93414	4.80484	3.58057		-0.424819	-0.211421
	10.5581	9.48003	9.21404		3.58656	2.73745	3.95557		-0.295406	0.129534
	9.93723	8.93944	8.26672		3.85498	3.04879	3.30485		-0.6187	-0.101175
	7.12219	9.14876	8.87141		1.2926	0.901793	4.0099		0.545805	0.723517
	8.19523	7.50783	8.23594		0.854862	0.890494	4.38309		-0.18937	0.792062
	1.30518	2.13459	0.829293		0.467354	0.517309	0.0641997		-0.372472	-0.673632
	1.84286	1.8604	2.79627		0.327007	0.255307	0.377153		0.554586	0.112578
	3.20253	3.48455	0.988254		1.4286	0.959539	0.746672		-0.668492	-0.291438
	9.74828	8.38118	7.13733		2.04631	1.78611	1.30025		-0.648841	-0.546279
	2.38896	1.92428	1.81566		0.47873	0.527596	0.480456		-0.430661	-0.0121419
	2.57947	1.8854	1.94676		0.283474	0.298908	0.276596		-0.536995	-0.204291
	11.5346	10.3974	12.4313		1.2188	1.33959	2.46721		0.194115	0.646738
	11.0863	10.269	12.1315		1.06049	1.24194	2.96297		0.555845	0.771672
	5.21686	4.34533	4.38854		1.62977	1.72427	1.58575		-0.638853	0.216223
	3.58171	3.03722	3.45175		1.45189	1.09602	2.03661		0.0461478	0.418615
	3.04111	3.5313	3.69557		0.286063	0.489374	0.760931		0.247809	0.839677
	0.961685	2.75752	1.89829		0.282544	0.452385	0.286739		0.479121	-0.110364
	9.05938	8.46427	8.19992		1.71779	1.88704	1.64818		-0.3036	-0.100746
	11.2694	8.8674	8.92011		1.05035	0.847278	1.22739		-0.649558	0.141837
	8.16783	8.03482	7.81887		3.43574	2.80614	3.04193		-0.0444611	-0.221439
	8.25517	6.26918	8.63961		2.21172	3.75078	7.38379		0.0612452	0.914425
	6.24675	7.40971	8.81764		2.15651	1.75333	1.48087		0.70356	-0.819848
	8.54592	7.3909	4.97424		2.81077	2.5311	1.43752		-0.785427	-0.737157
	7.56032	4.64867	4.3183		3.35206	3.18204	2.08929		-0.522036	-0.543395
	8.33636	5.89522	8.0911		3.87706	2.72095	1.63342		0.17974	-0.759944
	6.79845	6.55426	9.23545		2.15167	2.71233	1.8669		0.350916	-0.31133
	3.89841	2.21723	1.80341		0.675109	1.718	1.04073		-0.818408	0.335354
	2.20556	6.4194	6.55433		0.96244	3.91771	3.29896		0.509775	0.612579
	7.54548	5.30665	2.90973		1.64413	3.68509	3.5989		-0.525396	0.715308
	2.31141	1.80766	2.35145		0.887247	0.477237	0.367118		0.0447313	-0.746794
	4.18218	5.44581	7.47387		2.0966	2.87738	2.16254		0.753637	0.0959028
	6.48005	7.67354	7.34362		5.17136	3.50414	3.70617		0.384277	-0.265675
	8.12238	8.23884	10.6251		3.11692	1.99743	2.3495		0.363568	-0.112603
	7.56279	6.63713	5.69648		3.79296	3.6938	3.30031		-0.38114	-0.233034
	9.27591	9.69356	9.76666		5.99372	4.5512	3.86508		0.281365	-0.912895
	4.72276	4.25493	2.573		2.0392	1.94183	1.08651		-0.418901	-0.508463
	2.95643	8.225	4.63912		0.100773	0.0326194	0.197834		0.106901	0.00909221
	4.88244	6.64271	4.91648		0.207616	1.31578	0.831256		-0.10636	0.411814
	6.585	5.52918	6.56023		2.0806	1.87097	1.56234		-0.144565	-0.191885
	0.630503	7.00605	7.38074		0.336459	0.816473	0.23555		0.513573	-0.234863
	0	3.90107	5.22748		0.177236	1.80357	0.405487		0.701548	0.161806
	3.56158	3.80038	4.92363		1.4262	1.52873	1.52061		0.437293	-0.0695518
	4.44462	4.94515	5.88217		2.7049	1.74715	1.49163		0.368335	-0.414131
	1.79809	3.88871	2.64619		1.09917	0.906491	1.32903		0.249312	0.257198
	2.78404	2.51023	3.51649		1.0923	0.987418	0.782878		0.116252	-0.0652957
	2.47124	2.07951	4.02679		0.17457	0.18339	0.125565		0.228406	-0.117559
	6.81908	11.0202	16.9578		1.72902	1.31663	1.10339		0.789068	-0.47959
	7.31147	7.14646	10.4485		1.16611	1.74699	0.897363		0.380359	-0.128183
	2.57932	6.42371	6.99012		1.05395	1.22258	1.17423		0.817413	0.349509
	3.22641	4.57173	7.97951		1.76218	1.80909	1.53211		0.706215	-0.330925
	2.70807	3.76855	3.10369		1.63938	1.6478	1.18631		0.0979624	-0.257163
	4.38648	4.50837	6.78653		1.38841	0.698247	1.15356		0.628961	-0.257372
	4.24122	5.87814	6.30882		3.0683	1.39995	2.64549		0.566677	-0.100922
	4.15568	6.38368	4.10804		3.48305	2.00942	1.20867		-0.162809	-0.427878
	3.58146	2.75014	2.51369		1.57421	0.654144	1.20168		-0.294036	-0.250469
	9.47299	8.02532	7.99142		3.18058	0.828573	3.26825		-0.0396978	0.167599
	7.23024	7.17648	8.25249		1.73823	2.0097	2.67479		0.339837	0.506668
	0.786939	3.41018	8.06895		0.064597	0.224629	0.294146		0.888122	0.543744
	1.28265	6.24667	8.07292		0.442794	0.849176	0.174834		0.642385	-0.16626
	0.741008	6.40102	7.20655		2.42932	0.834192	2.88452		0.730652	-0.0955399
	5.36022	5.95654	6.67142		1.25121	1.06447	2.27936		0.323512	0.675569
	2.45607	3.35695	1.91613		1.57684	0.950655	0.693792		-0.111474	-0.482235
	6.79231	8.13943	6.86231		2.81303	2.91576	5.20731		0.185587	0.801807
	6.23752	3.02019	3.60615		3.78219	2.60016	2.14248		-0.641108	-0.709761
	2.01777	2.28392	2.0796		0.570851	0.600444	0.845642		-0.0223725	0.433673
	2.5005	1.94114	1.92767		0.660615	0.686379	0.769309		-0.371488	0.282746
	2.78897	3.55714	1.62342		0.75525	0.578166	0.446641		-0.312271	-0.565415
	1.5665	2.04664	2.2698		0.693127	0.811578	0.396553		-0.0301644	-0.533874
	6.99325	3.32547	4.28303		0.972104	2.42745	2.61408		-0.452756	0.649451
	3.33796	3.24632	1.98571		1.27868	1.62913	1.73527		-0.462862	0.0848853
	3.98064	6.13609	5.47876		1.33926	1.35214	1.53156		0.193647	-0.0528876
	2.39854	5.05783	3.2351		0.950991	0.900807	0.569733		0.0462363	-0.41293
	1.63668	0.362882	0.319025		0.147627	0.25823	0.250988		-0.602523	0.333062
	2.69219	2.24576	2.34549		1.59464	1.47028	1.01211		-0.157147	-0.487698
	5.81835	3.35248	3.00255		1.1081	0.557838	1.24086		-0.856043	0.0469423
	3.43464	4.13502	4.89926		1.13055	1.46915	1.85447		0.621383	0.509511
	4.36203	6.07272	4.30895		0.467245	0.268055	0.246681		-0.0878402	-0.614182
	3.22563	5.01477	2.48726		0.431893	0.382074	0.505314		-0.295233	0.129202
	0.903066	0.304514	0.609605		0.652422	0.449156	0.205462		-0.137728	-0.49406
	3.98172	1.49824	0.877163		0.577581	0.626529	0.201753		-0.901618	-0.277549
	2.32658	2.8301	2.89908		1.19057	0.789572	0.492988		0.0293161	-0.580069
	4.02384	3.60679	2.39509		1.79859	1.0287	1.07127		-0.396763	-0.561425
	2.62158	3.42681	2.86838		1.04233	1.14449	1.02175		0.0509897	0.0644088
	2.0686	1.7137	2.32363		0.193488	0.518922	0.470699		0.0489373	0.270534
	3.48353	6.97075	4.54974		1.52248	1.00481	0.521506		0.0888494	-0.382941
	3.26542	4.43159	4.00656		2.74082	2.43111	1.96175		0.185604	-0.544198
	4.58651	10.1023	7.51115		1.71888	3.17469	2.90681		0.372967	0.485567
	9.45705	10.2158	8.13544		2.94354	2.9815	3.36537		-0.30212	0.0384932
	11.6541	10.5378	8.55639		4.81632	3.67383	2.77251		-0.513477	-0.700945
	11.7036	9.23623	10.1361		3.96443	2.51125	1.16193		-0.372712	-0.628272
	4.96617	6.49519	3.14147		1.67869	1.31155	0.588161		-0.1751	-0.6217
	4.22484	6.29862	3.67221		0.577322	0.389174	0.329491		-0.224927	-0.51649
	3.40235	4.2485	1.87989		0.513301	0.519414	0.221255		-0.316272	-0.494897
	4.697	4.87831	4.01378		2.8329	1.84581	0.749657		-0.235684	-0.838505
	4.97267	2.99204	1.83832		1.51858	0.578785	0.302636		-0.525389	-0.658966
	5.47413	5.38907	4.48863		0.9416	0.75966	0.529217		-0.357234	-0.457104
	5.14351	6.17188	2.03396		0.639994	0.568129	1.40366		-0.664789	0.446329
	6.34713	4.46013	4.86253		2.13811	1.14757	2.27257		-0.531495	0.0599089
	7.02296	4.16752	3.24647		1.27273	2.22673	1.5497		-0.654395	0.266343
	7.78167	3.90729	6.21753		1.03995	0.763978	0.261711		-0.233927	-0.781835
	5.26872	3.01407	6.20328		1.33054	1.05071	2.10393		0.100873	0.431463
	3.66897	3.13446	2.82432		0.794812	1.66057	1.28112		-0.287973	0.271963
	3.58854	8.72779	5.69438		1.83553	1.86513	1.73425		0.339623	-0.088621
	0.600069	2.25144	2.50999		0.422617	0.353972	0.312848		0.346976	-0.134053
	1.08877	0.875054	0.954473		0.455527	0.282834	0.234122		-0.228456	-0.517751
	2.19743	4.70719	2.29586		0.386384	0.239458	0.0431737		-0.0869735	-0.832217
	2.94612	3.51455	3.16422		0.602042	1.14986	1.22552		-0.0738528	0.67474
	7.79633	12.6135	12.4632		4.8691	5.4925	5.99247		0.764172	0.432652
	8.02444	14.4162	14.4297		7.17527	6.38762	5.45405		0.644786	-0.360798
	2.67568	5.28683	4.79305		2.06483	1.06453	1.35743		0.419138	-0.350661
	3.49666	6.16991	4.27374		1.51706	1.31308	1.00162		-0.0175912	-0.61928
	3.47471	1.80535	1.57585		0.26279	0.238777	0.205442		-0.419976	-0.17039
	3.24382	2.37991	1.7994		1.18802	0.960818	0.987956		-0.660287	-0.220616
	7.1126	8.08686	11.0905		1.1921	2.08971	6.74288		0.734985	0.893401
	5.54107	5.72962	3.60885		1.9906	1.55213	2.28025		-0.560243	0.379313
	10.9745	11.0325	11.6046		2.35382	0.9542	3.97856		0.215048	0.503105
	13.1046	11.904	14.7659		0.918817	1.78615	4.92778		0.101238	0.624987
	7.12242	7.25934	11.009		3.57512	3.98035	7.02424		0.804148	0.839714
	9.18034	4.71982	3.97615		2.03535	0.688262	0.926371		-0.806257	-0.699335
	8.54465	3.47207	5.81668		1.51485	0.972376	1.61516		-0.387066	-0.0185665
	4.39323	3.75841	4.92635		1.70406	1.39255	2.32402		0.129713	0.585977
	7.90722	9.36966	8.9128		1.14206	2.02532	3.17723		0.258681	0.917668
	1.87147	1.01458	0.554948		0.337072	0.305418	0.481488		-0.803879	0.444799
	3.14371	4.40998	6.56789		0.982109	2.15644	2.51664		0.805242	0.61294
	6.12543	7.04213	7.04898		3.64915	2.92208	3.29002		0.171832	-0.0462691
	11.6652	16.7848	12.123		6.43756	4.99185	7.087		-0.05711	0.378297
	8.74317	10.5215	10.2492		5.19828	3.86612	5.94011		0.041399	0.429645
	5.34263	8.09247	5.19907		2.22308	4.1816	3.11158		-0.208467	0.334867
	3.77158	2.32041	2.93535		1.02194	0.949587	1.22198		-0.201982	0.427532
	4.24992	3.34638	2.35441		1.51149	1.44552	0.893642		-0.761556	-0.549408
	6.86764	3.90976	7.69177		1.35844	0.488562	2.73414		0.246232	0.616316
	1.91683	0.335604	4.66146		0.571396	0.394844	2.23642		0.62008	0.881159
	1.20906	1.44935	1.95573		0.61656	0.271151	0.895603		0.515158	0.339188
	4.94796	4.98081	4.31434		1.90521	1.06115	1.67607		0.0940051	-0.0944998
	6.1878	9.51991	9.34976		1.44268	1.86172	2.78253		0.507788	0.573855
	7.01734	7.49741	6.99998		3.1177	1.6176	2.79649		0.0348101	-0.258124
	6.39383	9.60731	6.6757		1.50048	1.90782	0.327993		0.0624758	-0.573426
	6.93202	5.08374	2.43186		2.40376	1.45495	0.899614		-0.649351	-0.625516
	3.32018	4.02717	4.39914		0.665962	2.88508	2.28571		0.289256	0.362806
	9.12216	10.0775	8.85233		3.62852	4.28905	2.70949		-0.181323	-0.41638
	5.57541	4.82315	4.36332		2.03175	3.14533	3.21186		-0.526131	0.380492
	5.45201	5.3352	5.06247		1.73006	1.59571	3.3239		-0.324882	0.476322
	2.22414	1.90144	0.695498		0.44931	0.375075	0.499514		-0.760183	0.0306487
	1.61736	2.23168	0.758424		0.721658	0.526203	0.887314		-0.139141	0.119954
	2.60495	2.58997	2.75648		0.877211	0.967093	0.88438		0.352965	0.0140448
	3.55516	3.64543	2.01488		0.106302	0.121056	0.176863		-0.412961	0.401428
	2.42658	2.61113	4.92132		1.30278	1.39869	1.55049		0.806988	0.346373
	3.29365	4.20127	6.02538		1.72194	1.49933	4.75478		0.712738	0.801675
	5.20536	10.2559	13.2559		2.63866	2.82079	2.71095		0.436118	0.0733682
	3.4569	3.6734	3.32221		2.27525	1.32627	1.72418		-0.131972	-0.41266
	2.59231	1.16418	1.07089		1.61557	0.518219	0.404998		-0.442466	-0.583681
	1.33496	0.533098	1.89507		0.402141	0.330284	0.409811		0.0950933	-0.0563144
	1.7503	1.053	2.96283		0.553945	0.550476	1.52831		0.625809	0.482466
	4.06874	1.66745	1.69535		1.09612	0.246863	0.0267457		-0.607123	-0.724013
	2.78249	2.61511	2.27427		0.99673	0.166874	0.237818		0.00614288	-0.627129
	3.55119	2.51415	5.7218		1.84241	1.05597	1.42429		0.429206	-0.119343
	4.42034	6.10234	4.92185		1.74715	1.21819	0.769179		0.172202	-0.447631
	6.7373	5.10902	5.73097		2.01816	0.625223	1.46575		0.00187127	-0.288072
	2.6533	4.95851	9.41377		1.96927	1.95398	1.90367		0.893957	-0.11854
	6.62049	6.78536	8.79806		1.46773	1.95776	3.06567		0.619544	0.703003
	8.61113	4.99729	2.09179		1.90289	1.12691	1.3021		-0.62449	-0.269079
	2.33307	1.4765	1.14155		0.00286087	0.225588	0.976187		-0.358287	0.903718
	4.50663	11.3024	7.93568		4.19831	2.5181	2.2585		0.423728	-0.795376
	2.66792	1.57734	4.34881		1.25194	0.517907	1.23465		0.341324	-0.0605018
	12.8337	8.16035	7.17851		4.32972	3.55483	3.42804		-0.556201	-0.313731
	13.3457	11.4514	9.97287		5.91831	5.32859	5.0679		-0.340956	-0.324562
	6.30718	5.83031	5.67266		1.9966	2.73363	2.48837		-0.0572587	0.298322
	5.8616	5.3592	4.7704		1.91071	1.16313	2.62717		-0.215493	0.31788
	3.48275	3.95326	3.02665		1.15049	0.93919	2.01714		-0.266329	0.27906
	1.52177	3.62066	5.32409		0.386719	0.804567	1.59872		0.536565	0.620204
	6.94018	6.66196	2.33405		2.19991	3.12751	0.682324		-0.469859	-0.481757
	5.3599	5.00783	1.55161		0.910574	1.74045	0.934703		-0.566321	0.0224772
	5.36112	9.1424	7.29562		1.25282	1.71907	1.75933		0.215064	0.326406
	2.61067	3.0141	2.55799		0.483214	0.94096	0.353601		-0.0808249	-0.370703
	2.60489	1.45373	1.58536		1.15045	0.61492	0.516122		-0.509097	-0.57439
	13.3219	18.0992	7.0541		7.2761	3.7976	4.52844		-0.546356	-0.708944
	3.88122	4.82922	8.65265		1.80054	1.30205	3.77351		0.811077	0.496895
	2.272	2.46102	4.94521		1.30856	0.848238	1.26093		0.819023	-0.020383
	2.42851	1.53091	2.98486		1.94259	1.25096	1.78347		0.435798	-0.140908
	2.47995	4.45785	4.30233		0.685841	2.60025	2.22828		0.657063	0.658033
	2.14519	0.514487	8.74306		0.217887	0.0349846	1.94091		0.605323	0.430833
	4.10428	5.92734	7.49144		0.455962	0.176716	0.19193		0.525671	-0.46649
	4.34277	4.73301	4.09229		0.185658	0.0621895	0.00675409		-0.283748	-0.608271
	15.3974	20.0323	13.2648		6.11995	6.93854	5.1609		-0.104561	-0.216781
	16.714	14.0518	13.1294		4.26481	5.07881	5.87465		-0.487468	0.33534
	1.79417	2.22421	4.48399		0.180971	0.341101	0.134367		0.836565	-0.322194
	7.6877	7.89435	8.09256		2.76615	3.29922	2.28951		0.284823	-0.265308
	4.694	5.22588	5.08468		0.934995	2.51759	4.0947		0.188388	0.876008
	2.91577	2.99303	0.264633		0.00898349	0.0257081	0.0197271		-0.768997	-0.000966644
	4.21925	5.29139	4.31827		1.91154	1.86246	1.33518		-0.214444	-0.407012
	10.8635	10.3166	5.78012		1.97066	0.91912	0.748501		-0.518574	-0.796557
	7.8024	6.09566	6.05723		0.870039	0.998027	2.87301		-0.234106	0.447526
	10.9654	8.46494	4.24555		1.30518	0.484113	0.39376		-0.696597	-0.465981
	11.5368	12.7541	11.8132		2.45376	1.92803	4.05424		0.0285335	0.278697
	8.30791	8.46931	8.53645		1.71727	2.26171	2.05189		0.0303609	0.132595
Mean	5.30219	5.34294	5.1475		1.70652	1.62416	1.74202
Median	4.24557	4.67793	4.35607		1.27571	1.15321	1.25373
SD	3.69789	3.62809	3.54268		1.70271	1.60019	1.79412
SEM	0.225885	0.221621	0.216404		0.10401	0.0977472	0.109593
n	268	268	268		268	268	268
