# Supplementary material for: Kv1.1 contributes to a rapid homeostatic plasticity of intrinsic excitability in CA1 pyramidal neurons in vivo
Source: eLife. 2019 Nov 27;8:e49915. doi: 10.7554/eLife.49915 (PMC6881145; doi:10.7554/eLife.49915)
Supplement: Figure 8—source data 1. [file elife-49915-fig8-data1.xlsx]

## Sheet: Novel
	In-field firing rate (Hz)				Out-of-field firing rate (Hz)				Lap-by-lap Correlation
	Start	Middle	End		Start	Middle	End		In-field	Out-of-field
	11.0092	11.4271	8.18878		3.45254	3.05367	1.99507		-0.672502	-0.776654
	7.01227	5.21617	5.16007		4.1693	2.02602	2.19056		-0.816255	-0.634932
	3.53465	3.57127	2.01742		2.33669	1.54636	0.950708		-0.71879	-0.748138
	6.50405	12.276	14.6937		6.11469	5.72421	6.25944		0.890365	-0.173412
	3.69696	3.45643	5.81645		1.31155	1.94292	1.84586		0.654238	0.267057
	2.13075	2.92562	0.447511		0.293448	0.147482	0.250335		-0.196322	-0.0724122
	4.03488	2.06632	2.0911		0.555221	0.292853	0.394164		-0.351127	-0.309215
	1.262	2.90356	4.23318		0.418489	1.05829	1.12555		0.699983	0.442694
	5.69972	4.98312	4.0804		3.50013	2.55463	1.39393		-0.31619	-0.770966
	0.830862	0.992579	1.45716		0.516995	0.68758	0.461118		0.715778	-0.432219
	0.671956	1.74304	1.57281		0.425553	0.636626	0.649177		0.427486	0.331254
	0.113307	1.32584	4.14662		0.381653	0.46716	0.346047		0.817682	-0.118522
	1.88257	4.65905	1.54778		0.0408633	0.223122	0.138682		-0.143307	0.262788
	3.2558	2.6523	4.87937		1.05847	1.1326	1.32163		0.342365	0.425013
	0.315816	0.401925	2.94797		0.465796	0.381684	0.715446		0.874352	0.408837
	2.44998	0.608973	0.976257		0.334665	0.971724	1.00817		-0.547568	0.121841
	0.483775	1.22619	4.13867		0.77218	0.500194	0.287797		0.635103	-0.734636
	0.841006	0.934211	1.21426		0.539307	0.701	0.974926		0.499184	0.52455
	0.205837	0.187901	1.38036		0.191196	0.552803	0.466423		0.601535	0.489544
	1.17228	1.47608	2.35956		1.33372	0.566491	0.50344		0.656654	-0.63973
	6.46376	5.90626	10.4543		3.94883	4.19478	5.59129		0.621243	0.435459
	2.41031	5.79799	5.79742		1.94629	1.93721	1.99355		0.285543	-0.125351
	1.87464	2.41727	6.49242		1.53652	1.93614	2.76131		0.624863	0.563899
	2.29837	8.73758	9.91005		1.46648	3.98604	3.74796		0.672801	0.537528
	2.18724	6.06959	6.23966		2.44955	3.85473	2.30709		0.673643	0.100209
	7.784	7.56132	9.2317		2.39584	2.60671	2.09994		0.251513	-0.164408
	2.52999	4.28942	7.14086		4.05409	3.26167	3.17313		0.970778	-0.583283
	1.91644	1.72054	1.81005		1.73723	0.854304	0.876332		0.0956548	-0.54549
	2.64599	2.70321	2.53651		1.44786	0.764755	0.611806		-0.0564388	-0.907292
	8.48439	10.2662	9.49696		7.17623	4.37845	5.28927		0.161424	-0.617681
	0.909709	0.33991	1.94234		0.504691	0.194366	0.564203		0.575114	0.176464
	1.02492	0.880011	2.36252		0.700433	0.439591	0.549221		0.563373	-0.444328
	2.73716	7.15052	1.97971		0.883261	0.78174	0.216867		-0.175752	-0.753557
	4.69994	7.60362	5.24633		0.696165	0.670865	0.33543		0.135319	-0.56338
	4.03021	3.81598	3.701		1.95815	2.30879	1.97299		-0.200795	-0.223721
	3.40063	6.4011	4.91812		1.88934	1.87382	2.29718		0.443687	0.162354
	7.02455	5.54713	5.19057		4.38162	4.93411	4.74925		-0.209195	0.173516
	2.94326	3.33889	2.89263		0.519118	0.418705	0.267828		0.173127	-0.209948
	4.36436	5.09602	4.41033		0.55808	0.233333	0.416981		0.142211	-0.192532
	0.902187	1.83293	0.80182		0.601491	0.351168	0.158964		0.0842695	-0.796121
	8.71788	5.30847	3.74798		4.12446	3.05379	2.25678		-0.828733	-0.703141
	6.60523	5.32778	3.27669		2.45149	2.74216	2.29636		-0.848174	-0.202153
	2.47335	2.78754	3.11444		2.25121	1.15793	0.94319		0.097922	-0.673306
	6.50505	3.5332	3.59733		1.57985	1.43151	1.33038		-0.660323	-0.478001
	3.77936	4.02503	1.39364		1.81969	1.53395	1.11983		-0.608625	-0.373013
	2.39332	2.31007	2.16239		1.84372	1.05875	1.30771		-0.0780379	-0.421298
	2.51523	3.45987	2.10776		1.29086	1.03433	0.883857		-0.359172	-0.285005
	1.67529	3.05097	5.01912		1.5584	2.12984	1.84074		0.942337	0.446707
	0.847646	1.82842	1.5666		0.575647	0.655909	0.617404		0.477246	0.232612
	1.44751	1.54613	3.37061		0.534319	1.58974	0.341059		0.510855	-0.234718
	2.93079	1.2821	2.14745		0.835833	0.295826	0.596381		-0.030107	-0.299725
	0.810786	2.86291	2.06307		0.683653	0.736989	0.657798		0.291613	-0.224502
	0.803036	0.583694	0.89428		0.386213	0.273588	0.484458		0.334972	0.423846
	3.93388	7.07611	5.9781		2.79752	2.54482	3.20024		0.477767	0.471016
	5.62639	4.38632	5.65609		2.06904	1.44034	3.49212		-0.108282	0.572285
	3.18369	4.00556	5.2006		1.68476	1.82698	1.41196		0.98045	-0.273864
	2.82827	3.77767	4.58564		0.908465	1.7995	1.68798		0.921691	0.773732
	4.2826	5.62536	3.77569		2.26634	1.64986	2.38309		-0.163709	0.226362
	1.26491	0.592268	1.35991		0.571264	0.337277	0.187432		-0.0901596	-0.857788
	2.23862	1.58796	0.75165		0.78426	0.684099	0.515205		-0.680818	-0.449886
	1.38018	2.29843	4.62534		1.30782	1.04852	1.1354		0.827037	-0.447786
	1.41694	1.18675	3.29274		0.547244	0.392691	1.12796		0.23135	0.558929
	2.468	2.0567	1.6899		0.33825	0.321038	0.486006		-0.421987	0.269051
	7.76849	6.21176	5.94605		1.83021	2.11183	2.27349		-0.656114	0.181208
	1.76948	4.22036	3.24843		1.15332	0.912958	1.65461		-0.0730806	0.441479
	0.187334	0.142303	1.24029		0.00279945	0.00184999	0.412392		0.698213	0.867529
	0	0.284047	2.36435		0	0.0574174	0.235924		0.840043	0.871431
	2.45559	1.61913	4.18219		0.313554	0.370008	1.41198		0.367751	0.636937
	3.05434	0.981665	5.01257		1.04117	0.36153	0.689086		0.306113	-0.413024
	4.12761	4.61623	3.25556		3.10128	2.00309	1.26813		-0.393016	-0.849366
	2.51859	3.77257	3.61096		1.23744	1.35678	0.902953		0.292328	0.0319137
	12.0471	15.6836	13.8343		6.79856	5.55263	6.31016		0.0849637	-0.107239
	0.907391	8.92418	8.279		0.69827	2.03951	3.57146		0.615142	0.796009
	2.33078	8.62613	14.7486		2.32157	2.33326	2.66551		0.847367	0.314759
	3.96355	9.82641	13.4442		2.84535	2.97585	2.0498		0.62425	-0.441912
	6.60078	5.54135	3.94029		2.30151	1.35889	1.25662		-0.64346	-0.705909
	10.1055	9.76804	10.5452		9.4915	4.52305	3.44181		0.252633	-0.793305
	9.86875	6.83657	5.82904		4.86776	1.93157	3.70918		-0.682208	-0.0146235
	5.56344	6.38248	3.77793		4.57258	4.87018	2.73403		-0.509158	-0.390006
	4.71434	3.51468	2.08563		1.32691	1.3084	0.581066		-0.936831	-0.743636
	3.28944	2.49428	2.10223		1.25711	0.915404	0.862033		-0.504306	-0.625086
	2.49503	3.40025	3.43505		2.01563	1.5211	1.27322		0.0233893	-0.679514
	0.409199	0.630183	8.73788		0.131414	0.271109	0.830355		0.529276	0.91992
	1.74275	5.21858	3.64526		0.272517	0.883764	0.889758		0.511121	0.83207
	3.40123	2.37241	3.37981		0.305855	1.1374	1.04399		0.0933513	0.613296
	2.0111	6.25214	3.9053		3.57452	2.80746	2.27823		0.154321	-0.636773
	7.27421	6.88956	9.17625		4.40333	2.97164	2.38388		0.357331	-0.594461
	9.28212	5.20997	5.71636		2.96058	2.67902	1.86511		-0.600573	-0.547715
	2.09953	1.58282	2.17654		1.15264	1.1113	0.436655		-0.0675747	-0.441105
	2.14858	2.37071	2.44976		0.738704	0.482852	0.796818		0.359956	0.0476179
	0.773322	1.19396	1.4898		0.547558	0.567963	0.230687		0.607157	-0.350719
	2.51599	0.682434	1.12286		0.640031	0.515482	0.794642		-0.492508	0.297791
	3.1753	2.01499	4.70139		0.815561	0.484397	0.476523		0.306412	-0.37011
	3.78428	5.38359	5.89405		0.737853	1.51292	1.21761		0.393639	0.335742
	2.6044	1.8946	1.69276		1.05324	0.92084	0.370196		-0.495457	-0.750515
	1.65536	1.85172	2.3869		1.39179	1.05658	0.993141		0.457539	-0.489426
	3.41014	3.80599	2.24536		1.35722	0.862591	0.976366		-0.346133	-0.135579
	6.90561	4.30436	1.91642		1.05433	0.735111	1.2024		-0.462395	0.150631
	6.08477	7.50693	6.79774		0.907011	1.13507	1.34563		0.343542	0.680769
	4.80654	6.9507	4.18603		0.689635	0.874093	0.976393		-0.0684395	0.461906
	5.64276	6.46075	5.41216		2.78727	2.60144	1.62002		-0.181001	-0.635177
	5.2807	4.67157	3.34758		1.9205	1.9528	2.01114		-0.471172	-0.0853422
	3.39382	3.7288	2.31587		0.72168	1.72541	0.323593		-0.413359	0.0201079
	4.38291	5.81943	3.24412		1.14542	2.02122	2.38076		-0.434652	0.537932
	4.30624	4.64652	4.33146		1.38363	1.32644	1.1404		0.0373801	-0.449701
	4.67163	4.70009	5.02103		0.456282	0.335691	0.111621		0.273969	-0.50105
	1.57594	2.8437	1.3461		0.496337	0.327905	0.260166		-0.209043	-0.472919
	1.73962	2.04472	9.64571		0.204129	0.0946464	0.0839933		0.837146	-0.403257
	0.267841	0	2.51997		0.157137	0.169345	0.693586		0.607061	0.581543
	1.08055	0.802607	0.419437		0.0404685	0.0375265	0.0227683		-0.253615	-0.199266
	6.837	3.29113	3.9078		2.95462	0.841573	0.753102		-0.70561	-0.819337
	7.63857	5.12322	3.98941		2.74924	1.6446	1.11022		-0.893059	-0.817387
	2.72002	1.6912	2.91528		0.469682	0.334201	0.326877		-0.0135667	-0.404844
	7.69813	9.73066	9.23015		3.56808	5.3696	3.9203		0.300898	0.25972
	1.7581	1.72865	3.06438		1.81026	0.931834	1.32286		0.555754	-0.494992
	1.73748	1.45351	1.21792		0.885657	0.443945	0.832707		-0.638708	-0.135734
	2.74119	2.80199	0.982651		0.284472	0.278872	0.659194		-0.727756	0.754807
	3.71011	2.45907	2.05454		1.27432	1.24991	0.909856		-0.717401	-0.402286
	7.05688	4.49749	7.80729		0.824201	0.404818	1.82714		0.146575	0.436116
	6.86986	4.44895	6.35061		0.461661	1.40027	1.33111		0.163982	0.334884
	6.42443	3.60445	4.16428		0.238991	0.160593	0.122871		-0.421039	-0.171109
	1.85733	0.922578	0.826535		0.0564396	0.0705131	0.0947776		-0.155918	0.148232
	4.39043	5.68194	5.67996		2.57304	1.95219	1.4229		0.166892	-0.505789
	2.80961	4.56254	5.77086		2.16604	3.1768	1.28196		0.608288	-0.489673
	5.72581	7.8134	5.65987		3.29025	1.28603	1.78702		0.0858135	-0.584289
	7.60656	6.90929	4.70952		2.40055	2.38501	2.07524		-0.708485	-0.156108
	2.17508	1.51906	3.51147		0.555838	0.346645	0.414635		0.497386	-0.166379
	0.733693	0.445437	0.75844		0.129936	0.872772	0.449488		-0.162301	0.179798
	3.33399	4.083	2.88849		1.42265	0.730045	0.897946		-0.269506	-0.303583
	2.78714	3.54655	3.88598		0.69895	1.40315	0.718687		0.648615	0.145426
	1.9268	3.26567	3.35118		0.767039	1.12157	1.00226		0.423017	0.306202
	2.42015	2.77328	5.38971		0.920879	0.61062	0.902153		0.680349	0.0614476
	0.831413	1.44455	3.26821		0.595332	0.429635	0.122419		0.847187	-0.697148
	0.734981	1.5887	1.96956		0.143805	0.116303	0.152871		0.496022	0.325032
	4.0542	3.80586	0.915734		0.463532	0.759393	0.0811456		-0.795936	-0.297991
	8.1466	2.25846	3.54418		1.00709	0.888339	0.552878		-0.536414	-0.335055
	4.089	7.1145	6.87826		2.70272	4.1035	2.37406		0.406643	-0.152057
	3.74752	6.88033	3.78108		2.4985	2.76972	1.69102		0.0755818	-0.282298
	4.87196	5.96435	3.27121		3.40963	2.36317	1.73439		-0.499993	-0.66943
	5.75768	9.65967	4.18413		2.80566	3.14927	0.760263		-0.271187	-0.736707
	2.35797	1.75131	2.31216		0.44055	0.120181	0.498849		-0.103458	0.0548307
	2.01818	1.64862	0.864615		0.313628	0.528663	0.381626		-0.299705	0.0443296
	2.58591	3.46093	3.08773		0.632409	1.99503	0.809185		-0.00256246	0.0905064
	2.82796	2.04485	4.20704		0.575154	1.63791	0.230593		0.345828	-0.0788255
	4.03518	3.69323	3.21033		1.57294	1.69701	0.79598		-0.215443	-0.379519
	6.37044	3.45325	2.7371		1.67696	2.26807	1.42341		-0.509682	0.00245673
	2.35461	4.07424	4.08975		0.469915	0.164822	0.157576		0.392851	-0.406406
	3.36494	1.02296	1.16416		0.289618	0.0954401	0.270042		-0.697208	-0.163425
	1.74499	2.52192	0.409705		0.271081	0.201902	0.0385412		-0.43304	-0.546131
	2.14632	1.50413	2.63897		0.356683	0.275307	0.109026		-0.0478589	-0.707246
	4.8836	5.5142	4.60657		2.51489	2.69697	1.87445		-0.0629906	-0.233652
	10.2874	3.21035	4.64651		5.38934	3.14234	1.75654		-0.688686	-0.742579
	7.09554	8.25833	10.4365		5.05098	3.25157	2.85594		0.34021	-0.755276
	11.7557	7.11016	10.8754		0.789589	0.441428	0.359291		-0.0227152	-0.532135
	6.2746	4.8002	7.58412		0.916005	0.454335	0.920428		0.354621	0.106511
	5.89247	4.26907	6.58238		2.265	2.52818	1.52189		0.183942	-0.371138
	6.44877	6.58067	8.24232		3.02952	2.54694	5.43886		0.140992	0.598494
	2.68285	1.25834	1.65852		0.745953	0.434854	0.258421		-0.38508	-0.618333
	4.31993	1.08731	0.505702		0.364038	0.310105	0.0393039		-0.785118	-0.667707
	6.22849	9.55852	7.86814		2.9244	4.86526	3.77435		0.129769	0.168591
	2.52806	0.983018	1.13009		0.893305	0.76635	0.616371		-0.325644	-0.67215
	1.44496	5.11426	8.22543		1.23683	1.46226	4.05314		0.86551	0.71569
	2.97363	5.04532	7.38638		1.48693	1.20461	3.9698		0.684756	0.797273
	1.93858	5.46743	6.25431		2.02631	2.49795	2.66894		0.907153	0.449061
	1.13344	2.92042	1.77713		0.938683	1.78748	1.29132		0.157597	0.0870438
	2.78024	1.65649	3.08721		0.881161	1.96034	0.973807		0.128459	0.0686281
	4.22415	2.82323	3.32462		2.58274	1.52344	1.93703		-0.270757	-0.226997
	2.30461	4.36959	3.55678		1.55814	1.68921	1.612		0.343886	-0.121696
	3.20054	3.00359	5.08461		1.63054	2.49466	1.88643		0.503382	-0.0188161
	1.40015	2.26342	2.95539		1.00741	0.887169	0.995957		0.179675	-0.226943
	0.230543	0.239174	1.92825		0.105113	0.0672022	0.322134		0.631558	0.360005
Mean	3.63209	3.91501	4.1857		1.58223	1.46542	1.36898
Median	2.82796	3.46093	3.55678		1.05847	1.12157	0.976393
SD	2.54492	2.71165	2.8629		1.49507	1.24816	1.24731
SEM	0.194615	0.207365	0.218932		0.114331	0.0954492	0.095384
N	171	171	171		171	171	171
